# Supplementary material for: Comparative analysis of the complete chloroplast genomes from six Neotropical species of Myrteae (Myrtaceae)
Source: PubMed Central journal article supplement (PMC7212760; doi:10.1590/1678-4685-gmb-2019-0302), 2020-05-08
Supplement: 1415-4757-GMB-43-2-e20190302-s4.pdf [file 1415-4757-GMB-43-2-e20190302-s4.pdf]

## Supplementary Material to “Comparative analysis of the complete chloroplast genomes from six Neotropical species of Myrteae (Myrtaceae)”

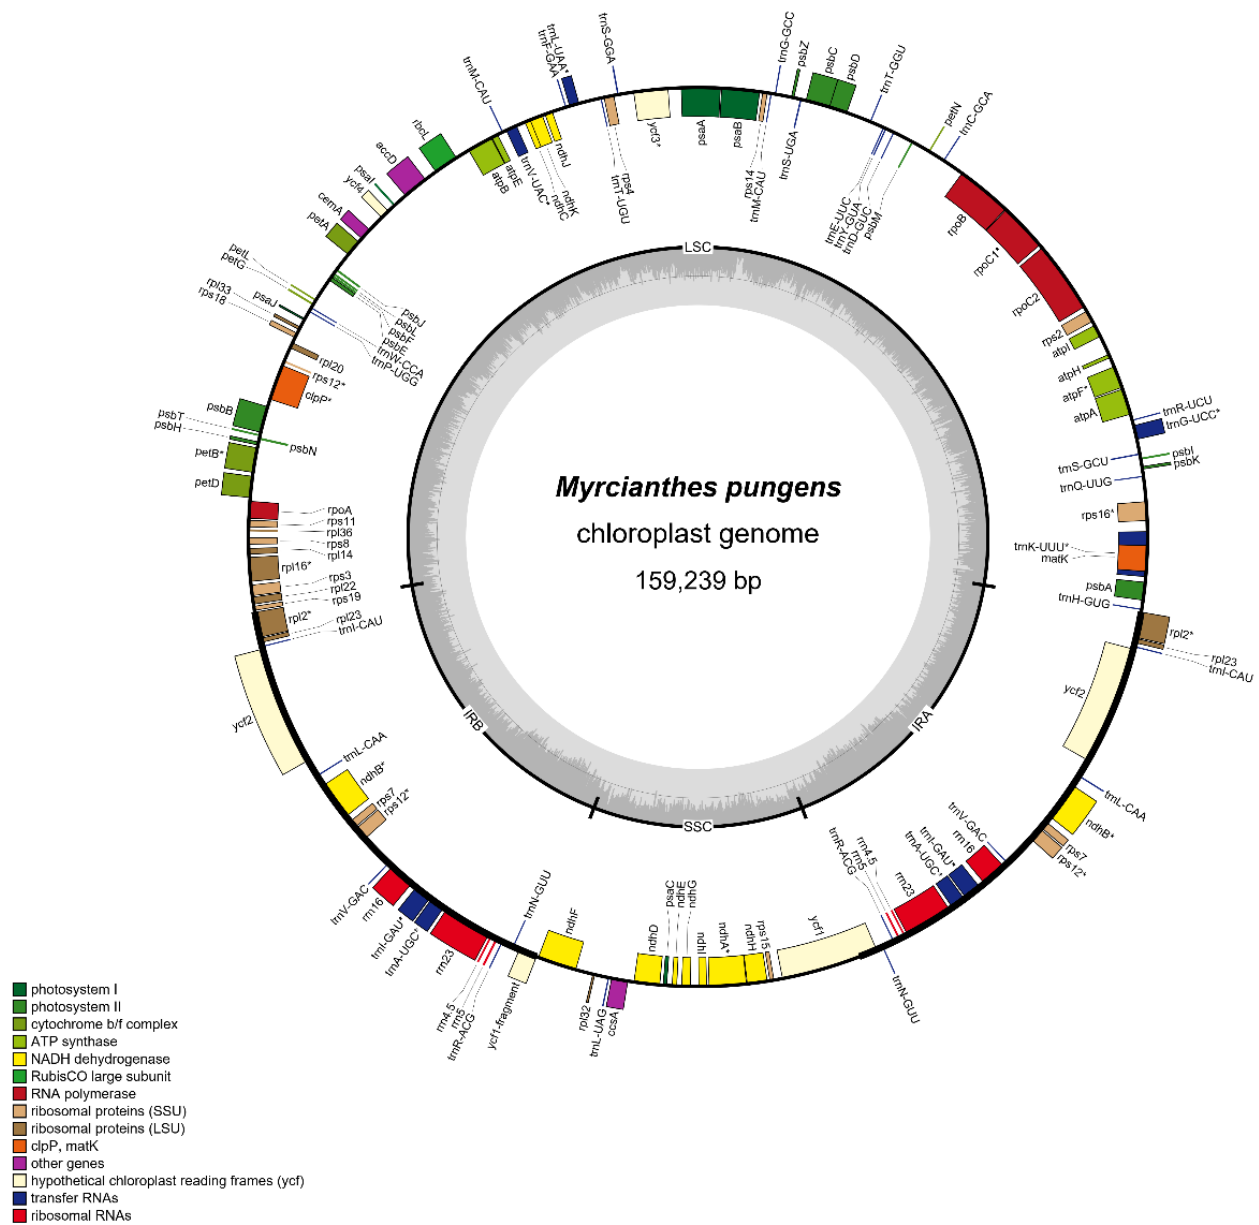

Figure S4 - Gene map of *Myrcianthes pungens* chloroplast genome.
