# Supplementary material for: Comparative analysis of the complete chloroplast genomes from six Neotropical species of Myrteae (Myrtaceae)
Source: PubMed Central journal article supplement (PMC7212760; doi:10.1590/1678-4685-gmb-2019-0302), 2020-05-08
Supplement: 1415-4757-GMB-43-2-e20190302-s10.pdf [file 1415-4757-GMB-43-2-e20190302-s10.pdf]

## Supplementary Material to ” Comparative analysis of the complete chloroplast genomes from six Neotropical species of Myrteae (Myrtaceae)”

*accD*

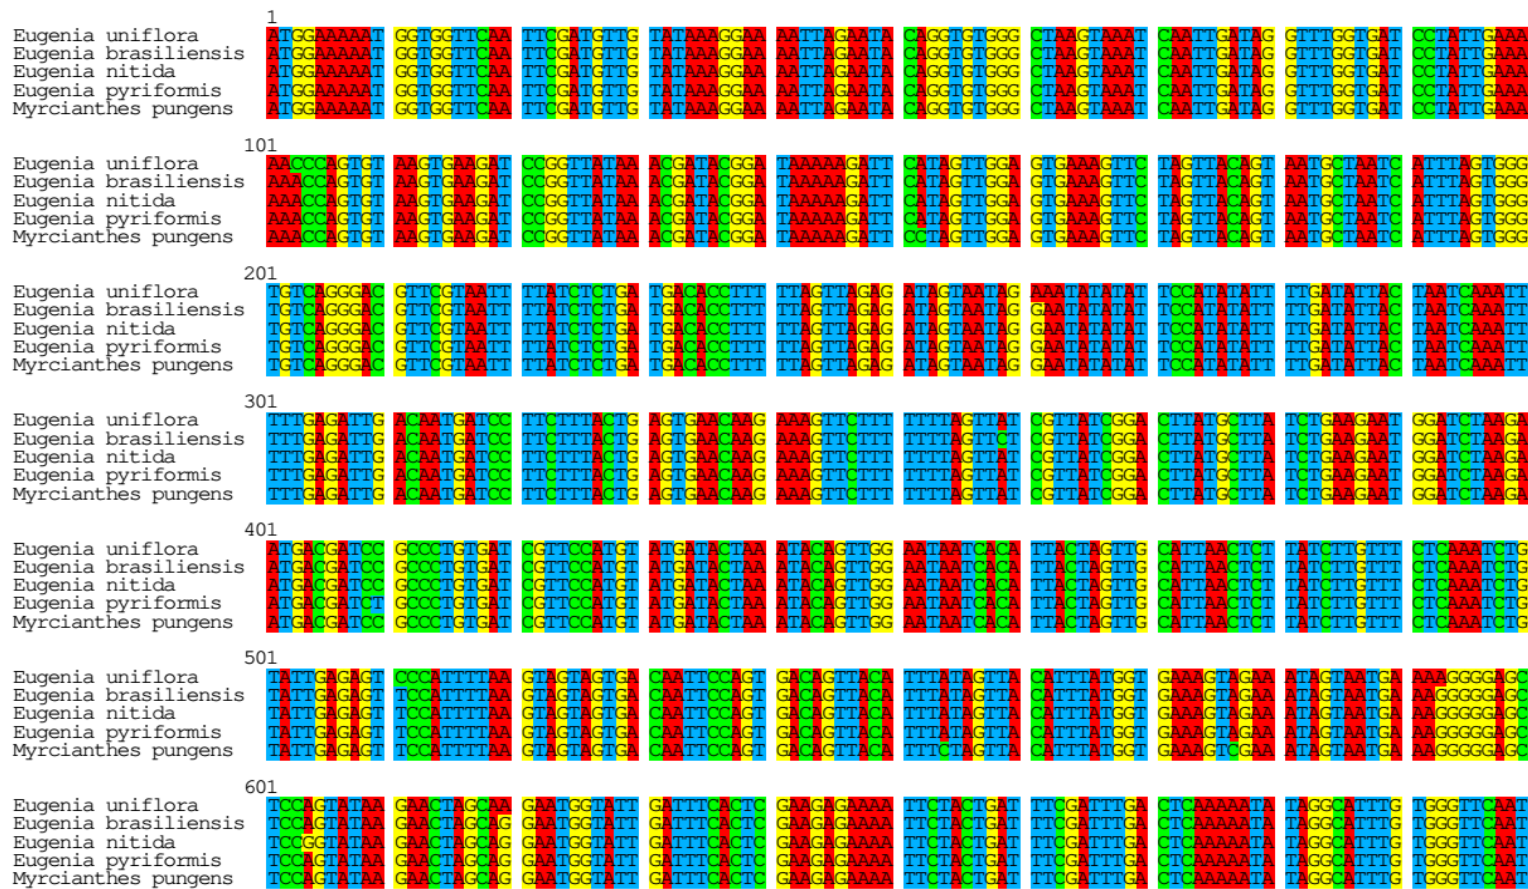

Figure S10 - Nucleotide alignment of *accD*, *ccsA*, *rpoC2*, *matK*, *ndhF* and *ycf1*.
