# Supplementary material for: Comparative analysis of the complete chloroplast genomes from six Neotropical species of Myrteae (Myrtaceae)
Source: PubMed Central journal article supplement (PMC7212760; doi:10.1590/1678-4685-gmb-2019-0302), 2020-05-08
Supplement: 1415-4757-GMB-43-2-e20190302-s11.pdf [file 1415-4757-GMB-43-2-e20190302-s11.pdf]

## Supplementary Material to “Comparative analysis of the complete chloroplast genomes from six Neotropical species of Myrteae (Myrtaceae)”

**Table S1** - List of 28 Myrtaceae chloroplast genomes used in chloroplast genome assembling of six Myrteae species.

| No. | Taxon       | GenBank accession number                          | Study                         |
|-----|-------------|---------------------------------------------------|-------------------------------|
| 1   | KX289887.1  | <i>Acca sellowiana</i>                            | (Machado <i>et al.</i> 2017)  |
| 2   | MG925369.1  | <i>Eucalyptus grandis</i>                         | (Pinard <i>et al.</i> 2019)   |
| 3   | NC_008115.1 | <i>Eucalyptus globulus</i> subsp. <i>globulus</i> | (Steane 2005)                 |
| 4   | NC_022395.1 | <i>Eucalyptus nitens</i>                          | (Bayly <i>et al.</i> 2013)    |
| 5   | NC_022396.1 | <i>Eucalyptus aromaphloia</i>                     | (Bayly <i>et al.</i> 2013)    |
| 6   | NC_022397.1 | <i>Eucalyptus saligna</i>                         | (Bayly <i>et al.</i> 2013)    |
| 7   | NC_022398.1 | <i>Eucalyptus camaldulensis</i>                   | (Bayly <i>et al.</i> 2013)    |
| 8   | NC_022399.1 | <i>Eucalyptus deglupta</i>                        | (Bayly <i>et al.</i> 2013)    |
| 9   | NC_022400.1 | <i>Eucalyptus spathulata</i>                      | (Bayly <i>et al.</i> 2013)    |
| 10  | NC_022401.1 | <i>Eucalyptus torquata</i>                        | (Bayly <i>et al.</i> 2013)    |
| 11  | NC_022402.1 | <i>Eucalyptus diversicolor</i>                    | (Bayly <i>et al.</i> 2013)    |
| 12  | NC_022403.1 | <i>Eucalyptus salmonophloia</i>                   | (Bayly <i>et al.</i> 2013)    |
| 13  | NC_022404.1 | <i>Eucalyptus microcorys</i>                      | (Bayly <i>et al.</i> 2013)    |
| 14  | NC_022405.1 | <i>Eucalyptus guilfoylei</i>                      | (Bayly <i>et al.</i> 2013)    |
| 15  | NC_022406.1 | <i>Eucalyptus erythrocorys</i>                    | (Bayly <i>et al.</i> 2013)    |
| 16  | NC_022407.1 | <i>Corymbia gummifera</i>                         | (Bayly <i>et al.</i> 2013)    |
| 17  | NC_022408.1 | <i>Corymbia maculata</i>                          | (Bayly <i>et al.</i> 2013)    |
| 18  | NC_022409.1 | <i>Corymbia eximia</i>                            | (Bayly <i>et al.</i> 2013)    |
| 19  | NC_022410.1 | <i>Corymbia tessellaris</i>                       | (Bayly <i>et al.</i> 2013)    |
| 20  | NC_022411.1 | <i>Angophora floribunda</i>                       | (Bayly <i>et al.</i> 2013)    |
| 21  | NC_022412.1 | <i>Angophora costata</i>                          | (Bayly <i>et al.</i> 2013)    |
| 22  | NC_022413.1 | <i>Allosyncarpia ternata</i>                      | (Bayly <i>et al.</i> 2013)    |
| 23  | NC_022414.1 | <i>Stockwellia quadrifida</i>                     | (Bayly <i>et al.</i> 2013)    |
| 24  | NC_027744.1 | <i>Eugenia uniflora</i>                           | (Eguiluz <i>et al.</i> 2017a) |
| 25  | NC_033355.1 | <i>Psidium guajava</i>                            | Unpublished                   |
| 26  | NC_034801.1 | <i>Plinia trunciflora</i>                         | (Eguiluz <i>et al.</i> 2017b) |
| 27  | NC_039395.1 | <i>Plinia cauliflora</i>                          | Unpublished                   |
| 28  | NC_039557.1 | <i>Plinia aureana</i>                             | Unpublished                   |

### References

Bayly MJ, Rigault P, Spokevicius A, Ladiges PY, Ades PK, Anderson C, Bossinger G, Merchant A, Udovicic F, Woodrow IE *et al.* (2013) Chloroplast genome analysis of Australian eucalypts – *Eucalyptus*, *Corymbia*, *Angophora*, *Allosyncarpia* and *Stockwellia* (Myrtaceae). *Mol Phylogenet Evol* 69:704–716.

Eguiluz M, Rodrigues NF, Guzman F, Yuyama P and Margis R (2017a) The chloroplast genome sequence from *Eugenia uniflora*, a Myrtaceae from Neotropics. *Plant Syst Evol* 303:1199–1212.

Eguiluz M, Yuyama PM, Guzman F, Rodrigues NF and Margis R (2017b) Complete sequence and comparative analysis of the chloroplast genome of *Plinia trunciflora*. *Genet Mol Biol* 40:871–876.

Machado L de O, Vieira L do N, Stefenon VM, Oliveira Pedrosa F de, Souza EM de, Guerra MP and Nodari RO (2017) Phylogenomic relationship of feijoa (*Acca sellowiana* (O.Berg) Burret) with other Myrtaceae based on complete chloroplast genome sequences. *Genetica* 145:163–174.

Pinard D, Myburg AA and Mizrachi E (2019) The plastid and mitochondrial genomes of *Eucalyptus grandis*. *BMC Genomics* 20:132.

Steane DA (2005) Complete Nucleotide Sequence of the Chloroplast Genome from the Tasmanian Blue Gum, *Eucalyptus globulus* (Myrtaceae). *DNA Res* 12:215–220.
