# Supplementary material for: Comparative analysis of the complete chloroplast genomes from six Neotropical species of Myrteae (Myrtaceae)
Source: PubMed Central journal article supplement (PMC7212760; doi:10.1590/1678-4685-gmb-2019-0302), 2020-05-08
Supplement: 1415-4757-GMB-43-2-e20190302-s12.pdf [file 1415-4757-GMB-43-2-e20190302-s12.pdf]

## Supplementary Material to “Comparative analysis of the complete chloroplast genomes from six Neotropical species of Myrteae (Myrtaceae)”

**Table S2** – Summary of libraries and assemblies from chloroplast genome of six Myrteae species.

| <b>Feature</b>      | <b><i>E. brasiliensis</i></b> | <b><i>E. nitida</i></b> | <b><i>E. pyriformis</i></b> | <b><i>M. pungens</i></b> | <b><i>P. edulis</i></b> | <b><i>P. cattleianum</i></b> |
|---------------------|-------------------------------|-------------------------|-----------------------------|--------------------------|-------------------------|------------------------------|
| Raw reads           | 39,271,776                    | 46,914,730              | 34,174,022                  | 48,777,706               | 36,919,420              | 38,628,416                   |
| Processed reads     | 38,751,186                    | 46,233,438              | 33,718,411                  | 48,186,086               | 36,486,495              | 38,158,315                   |
| Removed reads (%)   | 1.32%                         | 1.45%                   | 1.33%                       | 1.21%                    | 1.17%                   | 1.21%                        |
| Filtered reads      | 2,228,859                     | 2,229,459               | 1,303,789                   | 1,402,123                | 1,565,949               | 1,184,911                    |
| Coverage (%)        | 100%                          | 100%                    | 100%                        | 100%                     | 100%                    | 100%                         |
| Mean coverage       | 1,769                         | 1,772                   | 1,036                       | 1,108                    | 1,234                   | 936                          |
| Minimum coverage    | 46                            | 32                      | 17                          | 30                       | 13                      | 12                           |
| Maximum coverage    | 2,664                         | 3,620                   | 1,591                       | 1,783                    | 1,944                   | 1,508                        |
| Assembled scaffolds | 5                             | 7                       | 4                           | 8                        | 8                       | 7                            |
| Gaps                | 0                             | 0                       | 0                           | 0                        | 0                       | 0                            |
