# Supplementary material for: Comparative analysis of the complete chloroplast genomes from six Neotropical species of Myrteae (Myrtaceae)
Source: PubMed Central journal article supplement (PMC7212760; doi:10.1590/1678-4685-gmb-2019-0302), 2020-05-08
Supplement: 1415-4757-GMB-43-2-e20190302-s13.pdf [file 1415-4757-GMB-43-2-e20190302-s13.pdf]

## Supplementary Material to “Comparative analysis of the complete chloroplast genomes from six Neotropical species of Myrteae (Myrtaceae)”

**Table S3** – List of simple sequence repeats present in the six Myrteae plastomes.

| SSR | <i>Eugenia brasiliensis</i> | <i>Eugenia nitida</i> | <i>Eugenia pyriformis</i> | <i>Myrcianthes pungens</i> | <i>Plinia edulis</i> | <i>Psidium cattleianum</i> |
|-----|-----------------------------|-----------------------|---------------------------|----------------------------|----------------------|----------------------------|
| A   | 85                          | 88                    | 87                        | 89                         | 93                   | 93                         |
| C   | 3                           | 4                     | 3                         | 3                          | 2                    | 1                          |
| G   | 2                           | 1                     | 1                         | 1                          | 1                    | 1                          |
| T   | 98                          | 100                   | 98                        | 101                        | 101                  | 103                        |
| AG  | 2                           | 2                     | 2                         | 2                          | 2                    | 2                          |
| AT  | 21                          | 21                    | 20                        | 20                         | 20                   | 18                         |
| CA  | 1                           | 1                     | 1                         | 1                          | 0                    | 0                          |
| CT  | 3                           | 3                     | 3                         | 3                          | 4                    | 3                          |
| GA  | 6                           | 6                     | 6                         | 7                          | 6                    | 6                          |
| GT  | 0                           | 1                     | 0                         | 0                          | 0                    | 0                          |
| TA  | 11                          | 9                     | 11                        | 11                         | 9                    | 10                         |
| TC  | 6                           | 6                     | 6                         | 8                          | 8                    | 6                          |
| AAC | 2                           | 2                     | 2                         | 2                          | 2                    | 2                          |
| AAG | 2                           | 2                     | 2                         | 2                          | 4                    | 2                          |
| AAT | 4                           | 3                     | 3                         | 3                          | 4                    | 4                          |
| ACC | 1                           | 1                     | 1                         | 1                          | 1                    | 1                          |
| AGA | 4                           | 4                     | 4                         | 4                          | 4                    | 4                          |
| AGT | 1                           | 1                     | 2                         | 1                          | 1                    | 1                          |
| ATA | 4                           | 4                     | 4                         | 4                          | 4                    | 3                          |
| ATC | 1                           | 1                     | 1                         | 1                          | 1                    | 1                          |

| SSR  | <i>Eugenia brasiliensis</i> | <i>Eugenia nitida</i> | <i>Eugenia pyriformis</i> | <i>Myrcianthes pungens</i> | <i>Plinia edulis</i> | <i>Psidium cattleianum</i> |
|------|-----------------------------|-----------------------|---------------------------|----------------------------|----------------------|----------------------------|
| ATG  | 1                           | 1                     | 1                         | 1                          | 2                    | 2                          |
| ATT  | 4                           | 4                     | 5                         | 6                          | 6                    | 4                          |
| CAA  | 1                           | 1                     | 1                         | 1                          | 1                    | 1                          |
| CAG  | 2                           | 2                     | 2                         | 2                          | 2                    | 2                          |
| CTA  | 0                           | 0                     | 0                         | 0                          | 1                    | 1                          |
| CTG  | 1                           | 1                     | 1                         | 1                          | 1                    | 1                          |
| CTT  | 5                           | 4                     | 4                         | 4                          | 4                    | 4                          |
| GAA  | 3                           | 2                     | 3                         | 3                          | 4                    | 3                          |
| GCT  | 1                           | 1                     | 1                         | 1                          | 1                    | 1                          |
| GGA  | 1                           | 1                     | 1                         | 1                          | 1                    | 1                          |
| GGT  | 1                           | 1                     | 1                         | 1                          | 1                    | 1                          |
| TAA  | 4                           | 3                     | 3                         | 3                          | 5                    | 4                          |
| TAG  | 1                           | 1                     | 1                         | 1                          | 1                    | 1                          |
| TAT  | 1                           | 0                     | 1                         | 1                          | 2                    | 2                          |
| TCC  | 1                           | 1                     | 1                         | 1                          | 1                    | 1                          |
| TCT  | 4                           | 4                     | 4                         | 4                          | 4                    | 4                          |
| TGC  | 1                           | 1                     | 1                         | 1                          | 1                    | 1                          |
| TTA  | 6                           | 7                     | 7                         | 5                          | 4                    | 3                          |
| TTC  | 5                           | 5                     | 5                         | 5                          | 5                    | 6                          |
| TTG  | 3                           | 3                     | 3                         | 3                          | 3                    | 3                          |
| AATA | 1                           | 1                     | 1                         | 1                          | 1                    | 1                          |
| AGAT | 1                           | 1                     | 1                         | 1                          | 1                    | 0                          |
| ATAA | 0                           | 1                     | 1                         | 1                          | 1                    | 1                          |
| ATAG | 1                           | 1                     | 1                         | 1                          | 1                    | 1                          |
| ATTA | 2                           | 1                     | 2                         | 2                          | 1                    | 2                          |
| ATTT | 1                           | 1                     | 1                         | 1                          | 1                    | 1                          |

| <b>SSR</b>   | <b><i>Eugenia brasiliensis</i></b> | <b><i>Eugenia nitida</i></b> | <b><i>Eugenia pyriformis</i></b> | <b><i>Myrcianthes pungens</i></b> | <b><i>Plinia edulis</i></b> | <b><i>Psidium cattleianum</i></b> |
|--------------|------------------------------------|------------------------------|----------------------------------|-----------------------------------|-----------------------------|-----------------------------------|
| CTTG         | 1                                  | 1                            | 1                                | 1                                 | 1                           | 1                                 |
| GGTA         | 0                                  | 0                            | 0                                | 0                                 | 1                           | 0                                 |
| TAAA         | 1                                  | 0                            | 0                                | 0                                 | 0                           | 0                                 |
| TAAG         | 1                                  | 1                            | 1                                | 1                                 | 1                           | 1                                 |
| TAAT         | 1                                  | 1                            | 1                                | 1                                 | 1                           | 1                                 |
| TCTT         | 1                                  | 1                            | 1                                | 1                                 | 1                           | 1                                 |
| TTAT         | 0                                  | 0                            | 0                                | 0                                 | 0                           | 1                                 |
| TTTC         | 1                                  | 2                            | 2                                | 2                                 | 2                           | 2                                 |
| AATGG        | 0                                  | 1                            | 0                                | 0                                 | 0                           | 1                                 |
| TTTAT        | 0                                  | 0                            | 1                                | 0                                 | 0                           | 0                                 |
| <b>Total</b> | <b>315</b>                         | <b>316</b>                   | <b>317</b>                       | <b>322</b>                        | <b>330</b>                  | <b>321</b>                        |
