# Supplementary material for: Comparative analysis of the complete chloroplast genomes from six Neotropical species of Myrteae (Myrtaceae)
Source: Genet Mol Biol. 2020 May 8;43(2):e20190302. doi: 10.1590/1678-4685-GMB-2019-0302 (PMC7212760; doi:10.1590/1678-4685-GMB-2019-0302)
Supplement: Supplementary file 11 [file 1415-4757-GMB-43-2-e20190302-s9.pdf]

**Supplementary Material to “Comparative analysis of the complete chloroplast genomes  
from six Neotropical species of Myrteae (Myrtaceae)”**

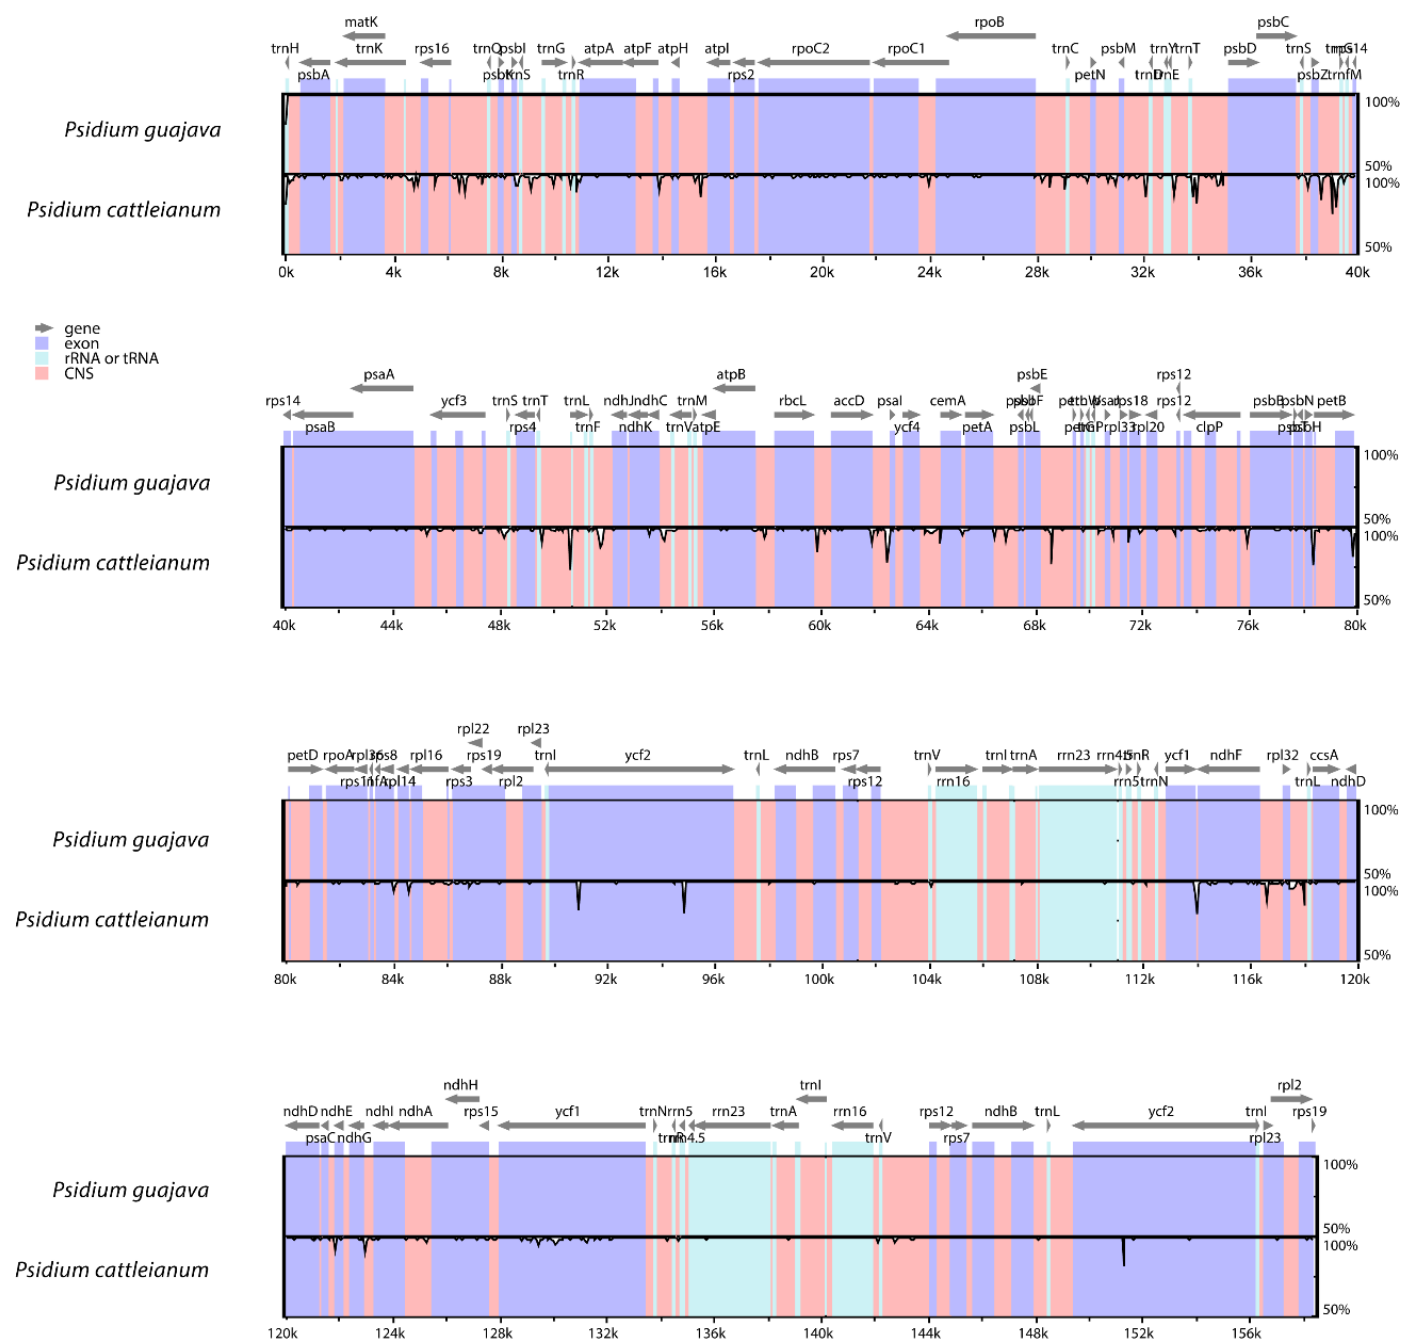

**Figure S9** - Sequence identity plot comparing plastomes of *Psidium* species.
